# Supplementary material
Source: publisher site journal article supplement (https://www.dovepress.com/article/339761)
Supplement: Supplementary file 1 [file get_supplementary_file.php]

1. **Supplementary Table S1.** Antimicrobial susceptibility of 15 LNSEFM determined by VITEK 2

| Isolate ID | Minimum inhibitory concentration (mg/L) | | | | | | | | | | | | |
| --- | --- | --- | --- | --- | --- | --- | --- | --- | --- | --- | --- | --- | --- |
| LZD | PEN | TET | TIG | ERY | AMP | CIP | HLSR | DAF | VAN | LEV | MOX | HLGR |
| EFM_3020 | 8R | ≥64R | 2S | ≤0.12S | ≥8R | ≥32R | ≥8R | SYN-R | 1 | 1S | ≥8R | ≥8R | SYN-R |
| EFM_0022 | ≥8R | ≥64R | ≥16R | ≤0.12S | ≥8R | ≥32R | ≥8R | SYN-R | 2 | ≤0.5S | ≥8R | ≥8R | SYN-R |
| EFM_8256 | 4I | 32R | ≥16R | 0.25S | ≥8R | ≥32R | ≥8R | SYN-R | 0.5 | 1S | ≥8R | ≥8R | SYN-R |
| EFM_5083 | ≥8R | ≥64R | ≥16R | ≤0.12S | ≥8R | ≥32R | ≥8R | SYN-R | 8 | ≤0.5S | ≥8R | 4R | SYN-R |
| EFM_2203 | 4I | ≥64R | ≥16R | ≤0.12S | ≥8R | ≥32R | ≥8R | SYN-R | 0.5 | ≤0.5S | ≥8R | ≥8R | SYN-S |
| EFM_8095 | 4I | 16R | 8I | ≤0.12S | ≥8R | ≥32R | ≥8R | SYN-R | 2 | ≤0.5S | ≥8R | ≥8R | SYN-S |
| EFM_8016 | 4I | ≥64R | ≥16R | ≤0.12S | ≥8R | ≥32R | ≥8R | SYN-S | 1 | ≤0.5S | ≥8R | ≥8R | SYN-S |
| EFM_4238 | ≥8R | ≥64R | ≥16R | ≤0.12S | ≥8R | ≥32R | ≥8R | SYN-R | 1 | ≤0.5S | ≥8R | ≥8R | SYN-S |
| EFM_9157 | 4I | 32R | ≥16R | ≤0.12S | ≥8R | ≥32R | ≥8R | SYN-R | 0.5 | ≤0.5S | ≥8R | ≥8R | SYN-R |
| EFM_7110 | ≥8R | ≥64R | ≥16R | ≤0.12S | ≥8R | ≥32R | ≥8R | SYN-R | 2 | ≤0.5S | ≥8R | ≥8R | SYN-S |
| EFM_9163 | ≥8R | ≥64R | ≤1S | ≤0.12S | ≥8R | ≥32R | ≥8R | SYN-R | 1 | ≤0.5S | ≥8R | ≥8R | SYN-R |
| EFM_0325 | ≥8R | 2S | ≤1S | ≤0.12S | ≥8R | ≤2S | 2I | SYN-S | 1 | ≤0.5S | 4I | 1S | SYN-S |
| EFM_0180 | ≥8R | 32R | ≥16R | ≤0.12S | ≥8R | ≥32R | ≥8R | SYN-S | 1 | ≤0.5S | ≥8R | ≥8R | SYN-R |
| EFM_2229  EFM_7150 | ≥8R  ≥8R | 16R  ≥64R | ≥16R  ≥16R | ≤0.12S  ≤0.12S | ≥8R  2R | 4R  ≥32R | 2I  ≥8R | SYN-R  SYN-R | 1  1 | ≤0.5S  ≤0.5S | 4I  ≥8R | 2I  ≥8R | SYN-S  SYN-R |

**Note:** ERY, erythromycin; PEN, penicillin G; TET, tetracycline; TIG, tigecycline; LZD, linezolid; AMP, ampicillin; CIP, ciprofloxacin; HLSR, high-level streptomycin resistance; DAF, quinupristin/dalofopine; VAN, vancomycin; LEV, levofloxacin; MOX moxifloxacin; HLGR, high-level gentamicin resistance.

1. **Supplementary Table S2.** Primers used for the molecular typing, and the detection of antimicrobial resistance

| Target gene | Primer Sequence (5’-3’) | Amplicon size (bp) | Reference | Annealing temperature**（℃）** |
| --- | --- | --- | --- | --- |
| Multilocus sequence typing | | | |  |
| *adk* | F: TATGAACCTCATTTTAATGGG | 437 | 1 | 50 |
| R: GTTGACTGCCAAACGATTTT |
| *atpA* | F: TTCAAATGGCTCATACGG | 556 |
| R: AGTTCACGATAAGCAACAGC |
| *ddl* | F: GAGACATTGAATATGCCTTAT | 465 |
| R: AAAAAGAAATCGCACCG |
| *gdh* | F: GGCGCACTAAAAGATATGGT | 530 |
| R: CCAAGATTGGGCAACTTCGTCCCA |
| *pstS* | F: TTGAGCCAAGTCGAAGCTGGA | 583 |
| R: CGTGATCACGTTCTACTTCC |
| *gyd* | F: CAAACTGCTTAGCTCCAAGGC | 395 |
| R: CATTTCGTTGTCATACCAAGC |
| *purK* | F: GCAGATTGGCACATTGAAAGT | 492 |
| R: TACATAAATCCCGCCTGTTTY |
| Mutations and Resistance gene | | | | |
| 23S RNA | F: AGTTTGACTGGGGCGGTC | 419 | 2 | 54 |
| R: CCGGTCCTCTCGTACTA |
| *rplC* (L3) | F: ATGACCAAAGGAATCTTAGGG | 618 | 3 | 55 |
| R: CACAGCTGATTTGATWGTGATT |
| *rplD* (L4) | F: GCCGAATGTAGCATTATTCAA | 617 | 3 | 55 |
| R: CAAGCACCTCCTCAATTTGAGT |
| *rplV* (L22) | F: GGACATGCTGCTGACGATA | 486 | 4 | 50 |
| R: ACCATTTAGCATCCCAGTCG |
| *optrA* | F: AGGTGGTCAGCGAACTAA | 1395 | 5 | 55 |
| R: ATCA ACTGTTCCCATTCA |
| *poxtA* | F: TCAATGCAGAGCAGGAAGCA | 791 | 6 | 52 |
| R: GGTGGATTTACCGACACCGT |
| *cfr* | F: TGAAGTATAAAGCAGGTT GGGAGTCA | 746 | 7 | 50 |
| R: ACCATATAATTGACCACA AGCAGC |
| *fexA* | F: TGGAGTTCCGATTTATGG  R: CACTTACTGCGGCGTTAT | 977 | 8 | 50 |

1. **Supplementary Table S3.** Genes on plasmid pEF7150-3

| Gene ID | Location | Gene Len (bp) | Protein Len（aa） | Direction | predicted gene | Product description | Top hit GenBank accession NO. | Identity（%） |
| --- | --- | --- | --- | --- | --- | --- | --- | --- |
| 1 | 1-210 | 210 | 69 | + |  | hypothetical protein (*Enterococcus sp*. 4E1_DIV0656) | WP_086373572.1 | 98.6 |
| 2 | 884-1330 | 447 | 148 | + |  | hypothetical protein (*Enterococcus sp*. 4E1_DIV0656) | WP_086373571.1 | 87.2 |
| 3 | 1327-1578 | 252 | 83 | + |  | hypothetical protein (*Enterococcus faecium*) | WP_086373570.1 | 95.2 |
| 4 | 1652-1927 | 276 | 91 | + |  | hypothetical protein (*Enterococcus faecium*) | WP_086373569.1 | 97.8 |
| 5 | 1950-2237 | 288 | 95 | + |  | hypothetical protein (*Enterococcus sp*. 4E1_DIV0656) | WP_086373568.1 | 88.4 |
| 6 | 2697-3605 | 909 | 302 | + |  | IS982-like element ISEfm1 family transposase (*Enterococcus faecium*) | WP_002295743.1 | 100 |
| 7 | 3720-3863 | 144 | 47 | + |  | hypothetical protein (*Enterococcus faecali*s 06-MB-DW-09) | EPH88365.1 | 83 |
| 8 | 4055-4456 | 402 | 133 | - |  | hypothetical protein (*Enterococcus*) | WP_086373566.1 | 91 |
| 9 | 4449-4694 | 246 | 81 | - |  | hypothetical protein (*Enterococcus*) | WP_023520641.1 | 87.3 |
| 10 | 4834-5853 | 1020 | 339 | + |  | LysM peptidoglycan-binding domain-containing protein (*Enterococcus*) | WP_086373564.1 | 95.6 |
| 11 | 6023-10654 | 4632 | 1543 | + |  | hypothetical protein (*Enterococcus faecium*) | WP_144809556.1 | 89.6 |
| 12 | 10819-11412 | 594 | 197 | + |  | class A sortase (*Enterococcus faecium*) | WP_086339223.1 | 98.5 |
| 13 | 11429-11698 | 270 | 89 | + |  | hypothetical protein (*Enterococcus faecium*) | WP_086339224.1 | 88.8 |
| 14 | 11695-11967 | 273 | 90 | + |  | hypothetical protein (*Enterococcus faecium*) | WP_086373560.1 | 87.8 |
| 15 | 12044-12316 | 273 | 90 | + |  | hypothetical protein (*Enterococcus faecium*) | OTO01138.1 | 92.2 |
| 16 | 12365-14599 | 2235 | 744 | + |  | hypothetical protein (*Enterococcus*) | OTO01139.1 | 97.2 |
| 17 | 14681-16996 | 2316 | 771 | + |  | hypothetical protein (*Enterococcus*) | WP_086339228.1 | 99.5 |
| 18 | 16986-17297 | 312 | 103 | + |  | hypothetical protein (*Enterococcus*) | WP_086339229.1 | 100 |
| 19 | 17302-17868 | 567 | 188 | + |  | hypothetical protein (*Enterococcus sp*. 4E1_DIV0656) | WP_086373556.1 | 98.4 |
| 20 | 17878-19809 | 1932 | 643 | + |  | ATPase (*Enterococcus sp*. 4E1_DIV0656) | WP_086373555.1 | 99.7 |
| 21 | 19842-20963 | 1122 | 373 | + |  | lysozyme family protein (Enterococcus faecium) | WP_086373554.1 | 98.9 |
| 22 | 20976-21632 | 657 | 218 | + |  | hypothetical protein (*Enterococcus sp*. 4E1_DIV0656) | WP_086373553.1 | 97.7 |
| 23 | 21661-21867 | 207 | 68 | + |  | hypothetical protein (*Enterococcus sp*. 4E1_DIV0656) | WP_086373552.1 | 97.1 |
| 24 | 21854-22681 | 828 | 275 | + |  | hypothetical protein (*Enterococcus sp*. 4E1_DIV0656) | WP_086373551.1 | 96.4 |
| 25 | 23501-24292 | 792 | 263 | + |  | hypothetical protein (*Enterococcus faecium*) | WP_086373550.1 | 99.2 |
| 26 | 24313-26073 | 1761 | 586 | + |  | type IV secretion system DNA-binding domain-containing protein (*Enterococcus faecium*) | WP_128432826.1 | 99.5 |
| 27 | 26018-26476 | 459 | 152 | + |  | CPBP family intramembrane metalloprotease (*Enterococcus faecium*) | WP_086339237.1 | 95.4 |
| 28 | 26496-26771 | 276 | 91 | + |  | helix-turn-helix domain-containing protein (*Enterococcus*) | OTO01152.1 | 100 |
| 29 | 27008-27112 | 105 | 34 | - |  | putative holin-like toxin (*Enterococcus faecium*) | WP_164890380.1 | 97.1 |
| 30 | 27188-27331 | 144 | 47 | - |  | hypothetical protein (*Enterococcus casseliflavus*) | WP_074934755.1 | 93.6 |
| 31 | 27840-28364 | 525 | 174 | + |  | hypothetical protein (*Enterococcus casseliflavus*) | WP_128489144.1 | 97.1 |
| 32 | 28405-28899 | 495 | 164 | + |  | hypothetical protein (*Enterococcus*) | WP_086339244.1 | 97.3 |
| 33 | 28896-29054 | 159 | 52 | + |  | hypothetical protein (*Enterococcus*) | OTO01159.1 | 98.1 |
| 34 | 29085-29573 | 489 | 162 | + | *ssb* | single-stranded DNA-binding protein (*Enterococcus*) | WP_144809525.1 | 94.4 |
| 35 | 29653-29880 | 228 | 75 | + |  | hypothetical protein (*Enterococcus*) | WP_016612842.1 | 98.7 |
| 36 | 29941-30702 | 762 | 253 | + |  | N-6 DNA methylase (*Enterococcus sp*. 4E1_DIV0656) | WP_086373540.1 | 95.7 |
| 37 | 30784-31257 | 474 | 157 | + |  | hypothetical protein (*Enterococcus faecalis* 06-MB-DW-09) | EPH91350.1 | 93 |
| 38 | 31320-31622 | 303 | 100 | + |  | hypothetical protein (*Enterococcus sp*. 4E1_DIV0656) | WP_086373538.1 | 89 |
| 39 | 31652-32290 | 639 | 212 | + |  | hypothetical protein (*Enterococcus* *casseliflavus*) | WP_074934741.1 | 94.8 |
| 40 | 32311-32559 | 249 | 82 | + |  | hypothetical protein (*Enterococcus*) | - | - |
| 41 | 32615-32860 | 246 | 81 | + |  | hypothetical protein (*Enterococcus*) | WP_101699651.1 | 90.1 |
| 42 | 32959-33282 | 324 | 107 | + |  | hypothetical protein (*Enterococcus sp*. CR-Ec1) | AUJ87441.1 | 45.8 |
| 43 | 33344-34069 | 726 | 241 | + |  | putative DNA/RNA non-specific endonuclease (*Enterococcus faecium*) | EPH91346.1 | 95.4 |
| 44 | 34559-34882 | 324 | 107 | + | *radC* | JAB domain-containing protein (*Enterococcus*) | WP_061054557.1 | 99 |
| 45 | 34996-36081 | 1086 | 361 | + | *tnpA* | tyrosine-type recombinase/integrase (Bacilli) | WP_000867971.1 | 100 |
| 46 | 36078-37997 | 1920 | 639 | + | *tnpB* | tyrosine-type recombinase/integrase (*Staphylococcus cohnii*) | WP_029658482.1 | 100 |
| 47 | 37999-38364 | 366 | 121 | + | *tnpC* | transposase C (Bacillus *sp*. BS-01) | WP_000619629.1 | 100 |
| 48 | 38647-39063 | 417 | 138 | - |  | NAD(P)H-dependent oxidoreductase (Bacteria) | WP_000855243.1 | 100 |
| 49 | 39241-40668 | 1428 | 475 | - | *fexA* | chloramphenicol/florfenicol efflux MFS transporter *FexA*(*Enterococcus faecium*) | WP_032495690.1 | 100 |
| 50 | 40922-41065 | 144 | 47 | - |  | hypothetical protein (Bacteria) | WP_002360221.1 | 100 |
| 51 | 41534-41734 | 201 | 66 | + |  | hypothetical protein (Bacilli) | WP_002360188.1 | 100 |
| 52 | 41741-42724 | 984 | 327 | + |  | DUF3991 domain-containing protein (Bacilli) | WP_002415362.1 | 100 |
| 53 | 43216-43740 | 525 | 174 | + |  | multidrug transporter (*Enterococcus faecium*) | WP_089202006.1 | 100 |
| 54 | 43745-44074 | 330 | 109 | + | *mobC* | MobC family plasmid mobilization relaxosome protein (Bacilli) | WP_089201990.1 | 100 |
| 55 | 44064-45518 | 1455 | 484 | + |  | elaxase/mobilization nuclease domain-containing protein (Bacilli) | AVE17179.1 | 100 |
| 56 | 45628-46794 | 1167 | 388 | + |  | hypothetical protein (Bacilli) | WP_089201991.1 | 100 |
| 57 | 46804-47040 | 237 | 78 | + |  | hypothetical protein (*Enterococcus faecalis*) | WP_159314662.1 | 100 |
| 58 | 47203-48357 | 1155 | 384 | + | *araC* | AraC family transcriptional regulator (Bacilli) | WP_002360186.1 | 100 |
| 59 | 48742-50655 | 1914 | 637 | + | *optrA* | ABC-F type ribosomal protection protein OptrA (*Enterococcus faecium*） | WP_159314661.1 | 100 |
| 60 | 51251-51349 | 99 | 32 | + | *radC* | JAB domain-containing protein (*Enterococcus faecalis* 06-MB-DW-09) | WP_023520729.1 | 96.9 |
| 61 | 51414-51869 | 456 | 151 | + |  | hypothetical protein (*Enterococcus faecalis* 06-MB-DW-09） | EPH87823.1 | 94.7 |
| 62 | 51866-53206 | 1341 | 446 | + | *pcfJ* | PcfJ domain-containing protein (*Enterococcus mundtii*） | WP_023520731.1 | 96.4 |
| 63 | 53366-53548 | 183 | 60 | + |  | hypothetical protein (*Enterococcus*) | WP_128432803.1 | 95 |
| 64 | 53532-53774 | 243 | 80 | + |  | hypothetical protein (*Enterococcus faecalis* 06-MB-DW-09) | WP_023520733.1 | 97.4 |
| 65 | 53985-55175 | 1191 | 396 | + |  | hypothetical protein (*Streptococcus suis*) | WP_044667295.1 | 42.2 |
| 66 | 55168-55455 | 288 | 95 | + |  | DUF4325 domain-containing protein (*Streptococcus salivarius*) | WP_118185917.1 | 38 |
| 67 | 55474-55935 | 462 | 153 | + |  | hypothetical protein (Bacteria) | WP_069655393.1 | 29.1 |
| 68 | 56238-56843 | 606 | 201 | + |  | cell filamentation protein (*Enterococcus faecium*) | WP_000599739.1 | 97.5 |
| 69 | 56859-57431 | 573 | 190 | + |  | recombinase family protein (*Enterococcus*) | WP_010723019.1 | 98.9 |
| 70 | 57619-58878 | 1260 | 419 | - |  | Abi family protein (*Enterococcus lemanii*） | WP_137665686.1 | 62.4 |
| 71 | 59186-59479 | 294 | 97 | + |  | recombinase family protein (*Enterococcus*) | WP_010723019.1 | 89.2 |
| 72 | 59823-61370 | 1548 | 515 | - |  | IS66 family transposase (*Enterococcus faecium*) | WP_002296127.1 | 100 |
| 73 | 61472-61825 | 354 | 117 | - | *tnpB* | IS66 family insertion sequence element accessory protein TnpB (*Enterococcus faecium*) | WP_014748777.1 | 100 |
| 74 | 61815-62009 | 195 | 64 | - |  | hypothetical protein (*Enterococcus faecium*) | WP_002285758.1 | 100 |
| 75 | 62088-62303 | 216 | 71 | - |  | hypothetical protein (*Enterococcus faecium*) | OTO90127.1 | 94.4 |
| 76 | 62424-63242 | 819 | 272 | - |  | hypothetical protein (*Enterococcus casseliflavus*） | WP_086333112.1 | 98.5 |
| 77 | 63765-63965 | 201 | 66 | + |  | Y-family DNA polymerase (*Enterococcus*) | WP_142425524.1 | 98.5 |
| 78 | 64214-65485 | 1272 | 423 | + | *impB* | ParA family protein (*Enterococcus*) | WP_002341710.1 | 98.8 |
| 79 | 65501-65866 | 366 | 121 | + |  | hypothetical protein (*Enterococcus*) | WP_086373578.1 | 95 |
| 80 | 66014-66418 | 405 | 134 | - |  | hypothetical protein (*Enterococcus*) | WP_086373577.1 | 91.8 |
| 81 | 66421-67242 | 822 | 273 | - | *parA* | ParA family protein (*Enterococcus*) | WP_002298756.1 | 97.1 |
| 82 | 67930-69429 | 1500 | 499 | + | *pRiT_C* | primase C-terminal domain-containing protein | WP_153884109.1 | 98 |
| 83 | 69591-69878 | 288 | 95 | + |  | type III secretion system protein PrgN (*Enterococcus faecium*) | WP_010706352.1 | 94.7 |
| 84 | 70053-71024 | 972 | 323 | - |  | helix-turn-helix transcriptional regulator (*Enterococcus faecium*) | WP_086373574.1 | 93.8 |
| 85 | 71694-71954 | 261 | 86 | + |  | hypothetical protein (*Enterococcus*) | EPH88483.1 | 82.6 |

1. **Supplementary Table S4.** Genes on plasmid pEF7150-5.

| Gene ID | Location | Direction | Gene length（bp） | Protein length（aa） | Predicted gene | | Product description | Accession NO. for top hit | Identity（%） |
| --- | --- | --- | --- | --- | --- | --- | --- | --- | --- |
| 1 | 3-308 | ＋ | 306 | 101 |  | protein rep（*Enterococcus*） | | WP_025191971.1 | 99 |
| 2 | 342-1022 | - | 681 | 226 |  | IS6-like element IS1216 family transposase（*Bacteria*） | | WP_001015311.1 | 100 |
| 3 | 1050-1163 | - | 114 | 37 |  | hypothetical protein（*Enterococcus faecium*） | | AGS77124.1 | 100 |
| 4 | 1455-1685 | - | 231 | 76 |  | hypothetical protein（*Enterococcus faecalis*） | | AEF32539.1 | 100 |
| 5 | 1688-2539 | - | 852 | 283 |  | hypothetical protein（*Bacteria*） | | WP_002287227.1 | 100 |
| 6 | 2640-2936 | - | 297 | 98 | *prgN* | replication control protein PrgN（*Bacteria*） | | [WP_000053907.1](https://www.ncbi.nlm.nih.gov/protein/WP_000053907.1?report=genbank&log$=prottop&blast_rank=1&RID=ESB49C4C013) | 100 |
| 7 | 3071-4564 | - | 1494 | 497 | *repR* | replication protein RepR（*Bacteria*） | | WP_000947691.1 | 100 |
| 8 | 5176-6129 | ＋ | 954 | 317 | *parA* | ParA family protein（*Bacteria*） | | WP_000429439.1 | 100 |
| 9 | 6101-6376 | ＋ | 276 | 91 | *prgO* | type III secretion system protein PrgO（*Bacteria*） | | WP_001196543.1 | 100 |
| 10 | 6604-7284 | ＋ | 681 | 226 |  | IS6-like element IS1216 family transposase（*Bacteria*） | | WP_001015311.1 | 100 |
| 11 | 7412-8371 | ＋ | 960 | 319 |  | IS30-like element IS1252 family transposase（*Bacilli*） | | WP_000222577.1 | 100 |
| 12 | 8804-9376 | - | 573 | 190 |  | recombinase family protein（*Bacilli*） | | WP_000170424.1 | 100 |
| 13 | 9392-9997 | - | 606 | 201 |  | cell filamentation protein（*Bacteria*） | | WP_000599739.1 | 100 |
| 14 | 10195-10875 | - | 681 | 226 |  | IS6-like element IS1216 family transposase（*Bacteria*） | | [WP_013646119.1](https://www.ncbi.nlm.nih.gov/protein/WP_013646119.1?report=genbank&log$=prottop&blast_rank=2&RID=ESCVVA65016) | 100 |
| 15 | 10929-12557 | - | 1629 | 542 | *poxtA* | ABC-F type ribosomal protection protein PoxtA（*Bacilli*） | | WP_002415638.1 | 100 |
| 16 | 13421-14101 | - | 681 | 226 |  | IS6-like element IS1216 family transposase（*Bacteria*） | | [WP_013646119.1](https://www.ncbi.nlm.nih.gov/protein/WP_013646119.1?report=genbank&log$=prottop&blast_rank=2&RID=ESE0EDEH016) | 100 |
| 17 | 14163-14846 | ＋ | 684 | 227 |  | peptidase P60/lipoprotein E（*Enterococcus faecium*） | | [HAP7631733.1](https://www.ncbi.nlm.nih.gov/protein/HAP7631733.1?report=genbank&log$=prottop&blast_rank=1&RID=ESE9GTPN01R) | 100 |
| 18 | 14843-15775 | ＋ | 933 | 310 |  | conjugal transfer protein（*Bacteria*） | | WP_001224319.1 | 100 |
| 19 | 16152-18071 | ＋ | 1920 | 639 | *tet(M)* | tetracycline resistance ribosomal protection protein Tet(M)（*Bacteria*） | | WP_001574275.1 | 100 |
| 20 | 18265-19641 | ＋ | 1377 | 458 | *tet(L)* | tetracycline efflux MFS transporter Tet(L)（*Bacteria*） | | WP_112080982.1 | 100 |
| 21 | 20205-20501 | ＋ | 297 | 98 |  | plasmid recombination protein（*Enterococcus faecium*） | | HAZ0580168.1 | 100 |
| 22 | 20622-21467 | ＋ | 846 | 281 |  | plasmid recombination protein（*Enterococcus faecium*） | | WP_192423965.1 | 100 |

References

1. Homan WL, Tribe D, Poznanski S, et al. Multilocus sequence typing scheme for Enterococcus faecium. *J Clin Microbiol*. Jun 2002;40(6):1963-71. doi:10.1128/jcm.40.6.1963-1971.2002

2. Bourgeois-Nicolaos N, Massias L, Couson B, Butel MJ, Andremont A, Doucet-Populaire F. Dose dependence of emergence of resistance to linezolid in Enterococcus faecalis in vivo. *The Journal of infectious diseases*. May 15 2007;195(10):1480-8. doi:10.1086/513876

3. Diaz L, Kiratisin P, Mendes RE, Panesso D, Singh KV, Arias CA. Transferable plasmid-mediated resistance to linezolid due to cfr in a human clinical isolate of Enterococcus faecalis. *Antimicrob Agents Chemother*. Jul 2012;56(7):3917-22. doi:10.1128/aac.00419-12

4. Lee S-M, Huh HJ, Song DJ, et al. Resistance mechanisms of linezolid-nonsusceptible enterococci in Korea: low rate of 23S rRNA mutations in Enterococcus faecium. *Journal of Medical Microbiology*. 2017;66(12):1730-1735. doi:<https://doi.org/10.1099/jmm.0.000637>

5. Wang Y, Lv Y, Cai J, et al. A novel gene, optrA, that confers transferable resistance to oxazolidinones and phenicols and its presence in Enterococcus faecalis and Enterococcus faecium of human and animal origin. *J Antimicrob Chemother*. Aug 2015;70(8):2182-90. doi:10.1093/jac/dkv116

6. Hao W, Shan X, Li D, et al. Analysis of a poxtA- and optrA-co-carrying conjugative multiresistance plasmid from Enterococcus faecalis. *J Antimicrob Chemother*. Jul 1 2019;74(7):1771-1775. doi:10.1093/jac/dkz109

7. Hua R, Xia Y, Wu W, Yang M, Yan J. Molecular Epidemiology and Mechanisms of 43 Low-Level Linezolid-Resistant Enterococcus faecalis Strains in Chongqing, China. *Ann Lab Med*. Jan 2019;39(1):36-42. doi:10.3343/alm.2019.39.1.36

8. Zou J, Tang Z, Yan J, et al. Dissemination of Linezolid Resistance Through Sex Pheromone Plasmid Transfer in Enterococcus faecalis. *Front Microbiol*. 2020;11:1185. doi:10.3389/fmicb.2020.01185
